# Supplementary material
Source: publisher site journal article supplement (https://www.spandidos-publications.com/4818/downloadSupplementary)
Supplement: Supplementary file 1 [file downloadSupplementary]

**Table SV.** Pearson correlation coefficient of the NCI-60 drug z-scores with gene expression and detailed information of the drugs.

| Drug             | Targeted genes | Correlation | P-value               | Drug description                                                                                                                                                                                                                                                                                      | FDA status                | Associated conditions                                                                                                                                                             |
|------------------|----------------|-------------|-----------------------|-------------------------------------------------------------------------------------------------------------------------------------------------------------------------------------------------------------------------------------------------------------------------------------------------------|---------------------------|-----------------------------------------------------------------------------------------------------------------------------------------------------------------------------------|
| Nelarabine       | MYB            | 0.586592    | $8.43 \times 10^{-7}$ | Nelarabine is an antineoplastic agent that is typically employed to treat acute T-cell lymphoblastic leukemia. Nelarabine is a purine nucleoside analog converted to its corresponding arabinosylguanine nucleotide triphosphate (araGTP), resulting in inhibition of DNA synthesis and cytotoxicity. | Approved, Investigational | Lymphoblastic lymphoma (precursor T-lymphoblastic lymphoma/leukemia) refractory, refractory acute lymphoblastic leukemia                                                          |
|                  | HES1           | 0.36046     | 0.004667              |                                                                                                                                                                                                                                                                                                       |                           |                                                                                                                                                                                   |
|                  | SLC11A2        | 0.305285    | 0.017696              |                                                                                                                                                                                                                                                                                                       |                           |                                                                                                                                                                                   |
|                  | HILPDA         | 0.304768    | 0.017899              |                                                                                                                                                                                                                                                                                                       |                           |                                                                                                                                                                                   |
|                  | YWHAЕ          | 0.276272    | 0.032618              |                                                                                                                                                                                                                                                                                                       |                           |                                                                                                                                                                                   |
| Tamoxifen        | CD44           | -0.4532     | 0.000277              | Tamoxifen is a non-steroidal antiestrogen used to treat estrogen receptor-positive breast cancers as well as to prevent the incidence of breast cancer in high-risk populations.                                                                                                                      | Approved                  | Breast cancer, desmoid tumors, endometrial cancer, gynecomastia, invasive breast cancer, invasive breast, carcinoma, metastatic breast cancer, ovarian cancer, precocious puberty |
|                  | MYB            | 0.394692    | 0.001804              |                                                                                                                                                                                                                                                                                                       |                           |                                                                                                                                                                                   |
|                  | DBN1           | -0.33686    | 0.008492              |                                                                                                                                                                                                                                                                                                       |                           |                                                                                                                                                                                   |
|                  | HILPDA         | 0.302482    | 0.018822              |                                                                                                                                                                                                                                                                                                       |                           |                                                                                                                                                                                   |
| Dolastatin 10    | DBN1           | -0.42089    | 0.000812              | Dolastatin 10 has been used in trials studying the treatment of sarcoma, leukemia, lymphoma, liver cancer, and kidney cancer, among others.                                                                                                                                                           | Investigational           | NA                                                                                                                                                                                |
|                  | MYB            | 0.30043     | 0.019683              |                                                                                                                                                                                                                                                                                                       |                           |                                                                                                                                                                                   |
|                  | YWHAЕ          | -0.27034    | 0.036699              |                                                                                                                                                                                                                                                                                                       |                           |                                                                                                                                                                                   |
|                  | HSPB1          | -0.26259    | 0.042664              |                                                                                                                                                                                                                                                                                                       |                           |                                                                                                                                                                                   |
|                  | CD44           | -0.26043    | 0.044462              |                                                                                                                                                                                                                                                                                                       |                           |                                                                                                                                                                                   |
| Nitrogen mustard | MYB            | 0.35644     | 0.005184              | A vesicant and necrotizing irritant destructive to mucous membranes, mechlorethamine is an alkylating drug.                                                                                                                                                                                           | Approved, Investigational | Bronchogenic carcinoma, chronic lymphocytic leukemia, Hodgkin's disease, diffuse lymphoma , MF, polycythemia vera, stage I MF, malignant effusion                                 |
|                  | HILPDA         | 0.285058    | 0.02727               |                                                                                                                                                                                                                                                                                                       |                           |                                                                                                                                                                                   |
|                  | CD44           | -0.27682    | 0.032259              |                                                                                                                                                                                                                                                                                                       |                           |                                                                                                                                                                                   |

|               |         |          |                       |                                                                                                                      |                 |    |
|---------------|---------|----------|-----------------------|----------------------------------------------------------------------------------------------------------------------|-----------------|----|
|               | IFNG    | 0.260499 | 0.044408              |                                                                                                                      |                 |    |
| Perifosine    | MYB     | 0.332973 | 0.009334              | Perifosine is a novel alkylphospholipid with antiproliferative properties attributed to protein kinase B inhibition. | Investigational | NA |
|               | HSPB1   | -0.27363 | 0.034385              |                                                                                                                      |                 |    |
|               | HILPDA  | 0.270237 | 0.036776              |                                                                                                                      |                 |    |
|               | DBN1    | -0.25891 | 0.045769              |                                                                                                                      |                 |    |
| Chelerythrine | MYB     | 0.656769 | 1.21x10 <sup>-8</sup> | -                                                                                                                    | -               | -  |
|               | HSPB1   | -0.3594  | 0.004799              |                                                                                                                      |                 |    |
|               | HILPDA  | 0.322057 | 0.012093              |                                                                                                                      |                 |    |
|               | SLC11A2 | 0.286525 | 0.026454              |                                                                                                                      |                 |    |
| SR16157       | CD44    | -0.44115 | 0.000419              | -                                                                                                                    | -               | -  |
|               | HILPDA  | 0.319575 | 0.012811              |                                                                                                                      |                 |    |
|               | HSPB1   | 0.294701 | 0.022269              |                                                                                                                      |                 |    |
|               | MYB     | 0.25906  | 0.045638              |                                                                                                                      |                 |    |

FDA, Food and Drug Administration; MF, mycosis fungoides; NA, not available; -, no documentation is available about this drug.
